# Supplementary material for: Integrating Antimicrobial Therapy with Host Immunity to Fight Drug-Resistant Infections: Classical vs. Adaptive Treatment
Source: PubMed Central journal article supplement (PMC4831758; doi:10.1371/journal.pcbi.1004857), 2016-04-14
Supplement: pcbi.1004857.s002.pdf [file pcbi.1004857.s002.pdf]

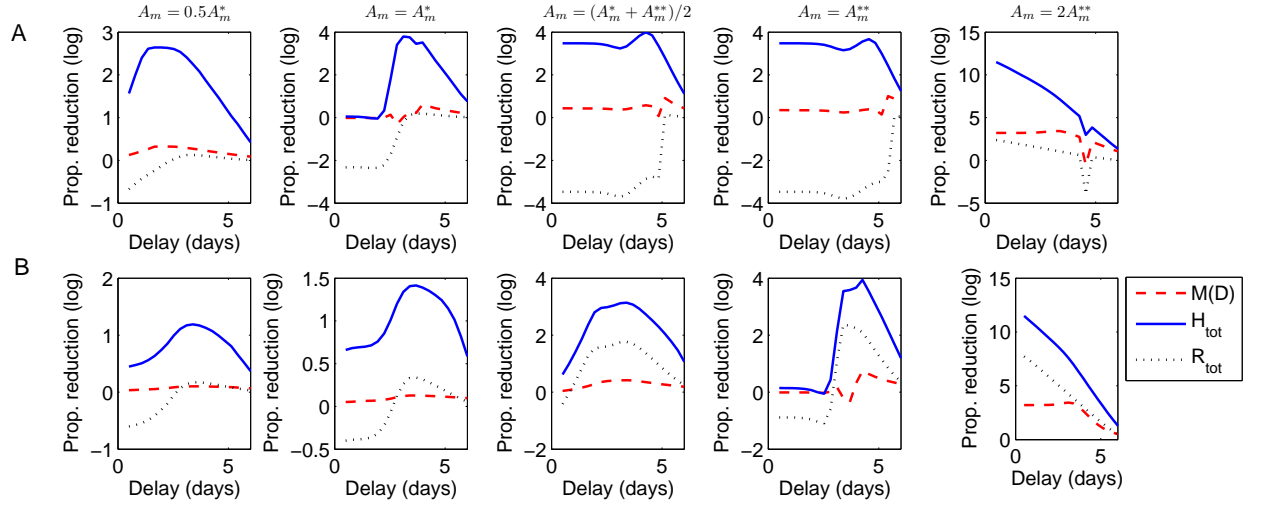

Figure S1: **Effects of antibiotic therapy as a function of the time of treatment onset.** A)  $c = 2.2$  (high cost of resistance, as in Table ??). B)  $c = 0.1$  (small cost of resistance). Other parameters as in Table 1. Infections were simulated for 30 days. The different lines depict the proportional reduction (on a log-scale) in different infection measures, relative to no-treatment:  $M(D)$  refers to final immune memory,  $H_{tot}$  to cumulative immunopathology, and  $R_{tot}$  to overall resistance. We see a maximum effect at intermediate delays for moderate doses below and within the critical range  $[A_m^*, A_m^{**}]$ , signalling the benefit of host immunity involvement in clearance. This benefit does not apply when aggressive doses are deployed.
