# Supplementary material for: Integrating Antimicrobial Therapy with Host Immunity to Fight Drug-Resistant Infections: Classical vs. Adaptive Treatment
Source: PubMed Central journal article supplement (PMC4831758; doi:10.1371/journal.pcbi.1004857), 2016-04-14
Supplement: pcbi.1004857.s003.pdf [file pcbi.1004857.s003.pdf]

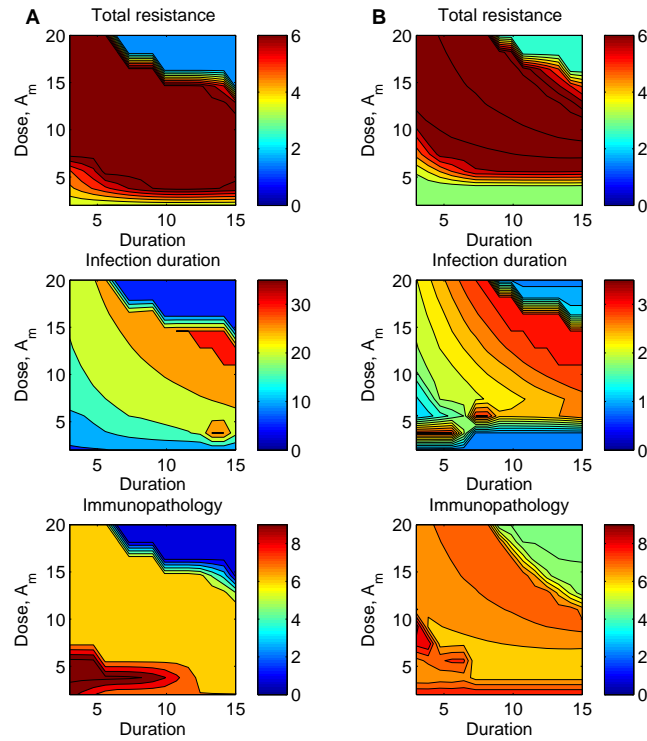

Figure S2: **Dose-duration interaction, for 2 treatment delays.** A)  $\tau_1 = 2$  days. B)  $\tau_1 = 4$  days. Parameters as in Table 1. Top panel shows  $\log_{-10} R_{tot}$  and bottom panel shows  $\log_{-10} H_{tot}$ , where infections were simulated for 30 days. The same outcomes can be obtained by trading off dose and treatment duration. When treatment onset exceeds the time required for immune stimulation (B), lower dose-duration ( $A_m, \tau_2$ ) combinations become more effective.
