# Supplementary material for: Integrating Antimicrobial Therapy with Host Immunity to Fight Drug-Resistant Infections: Classical vs. Adaptive Treatment
Source: PubMed Central journal article supplement (PMC4831758; doi:10.1371/journal.pcbi.1004857), 2016-04-14
Supplement: pcbi.1004857.s004.pdf [file pcbi.1004857.s004.pdf]

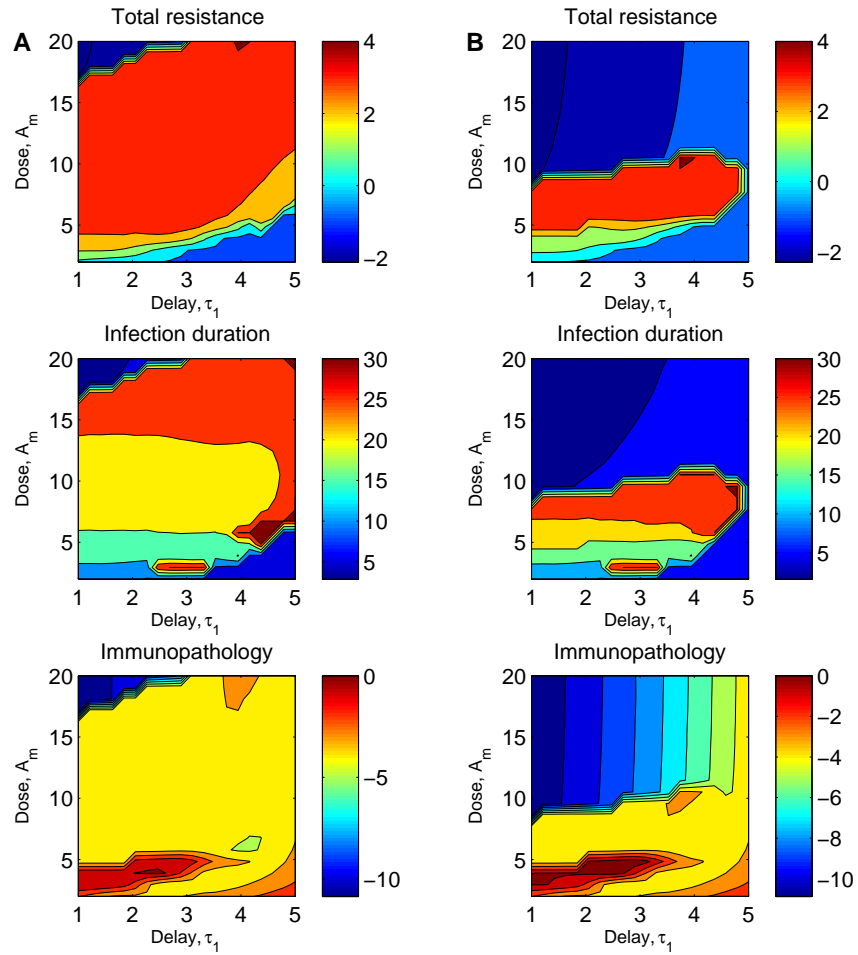

Figure S3: **Dose-delay interaction determines multiple infection outcomes.** A)  $a = 0.1$  (high resistance of  $B_r$ ). B)  $a = 0.2$  (lower resistance of  $B_r$ ). Parameters as in Table 1. Top panel shows log-ratios  $R_{tot}$  between treated and untreated infection, and bottom panel shows log-ratio  $H_{tot}$  between treated and untreated infection, where infections were simulated for 30 days. Negative values imply an improvement relative to no-treatment.
