# Supplementary material for: Integrating Antimicrobial Therapy with Host Immunity to Fight Drug-Resistant Infections: Classical vs. Adaptive Treatment
Source: PubMed Central journal article supplement (PMC4831758; doi:10.1371/journal.pcbi.1004857), 2016-04-14
Supplement: pcbi.1004857.s006.pdf [file pcbi.1004857.s006.pdf]

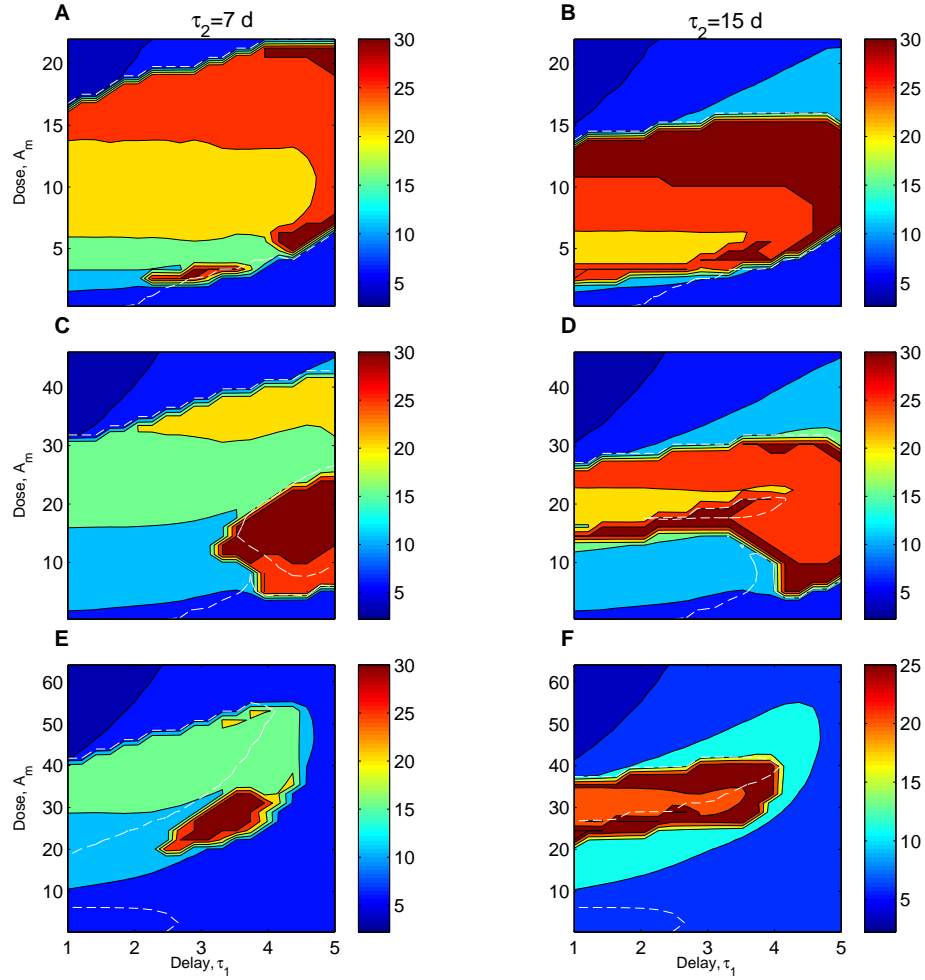

Figure S5: **Treatment duration and time to clearance for Fig. 5 in the paper, related to classical treatment.** We show a contourplot of the duration of treated infection across a range of dose-delay treatment combinations, for the case of  $a = 0.1$ . The cost of resistance is: A)-B)  $c = 2.2$ , C)-D)  $c = 1$ , E)-F)  $c = 0.1$ . The MSW is given by the region confined within the white dashed line. All parameters as specified in Fig. 5 of the paper. The two columns correspond to the first and third column in Fig. 5 respectively for treatment duration of 7 days and 15 days. Above the MSW, treatment duration reduces time to clearance for the same dose-delay combinations. Below the MSW, increasing treatment duration has no major effect. Notice that increasing treatment duration around the critical inhibitory dose for  $B_r$ , namely around  $A_m^{**} = \frac{r_1}{a\delta_0}$  can worsen treatment outcomes, inducing oscillatory dynamics (infection still persisting after 30 days).
