# Supplementary material for: Integrating Antimicrobial Therapy with Host Immunity to Fight Drug-Resistant Infections: Classical vs. Adaptive Treatment
Source: PubMed Central journal article supplement (PMC4831758; doi:10.1371/journal.pcbi.1004857), 2016-04-14
Supplement: pcbi.1004857.s008.pdf [file pcbi.1004857.s008.pdf]

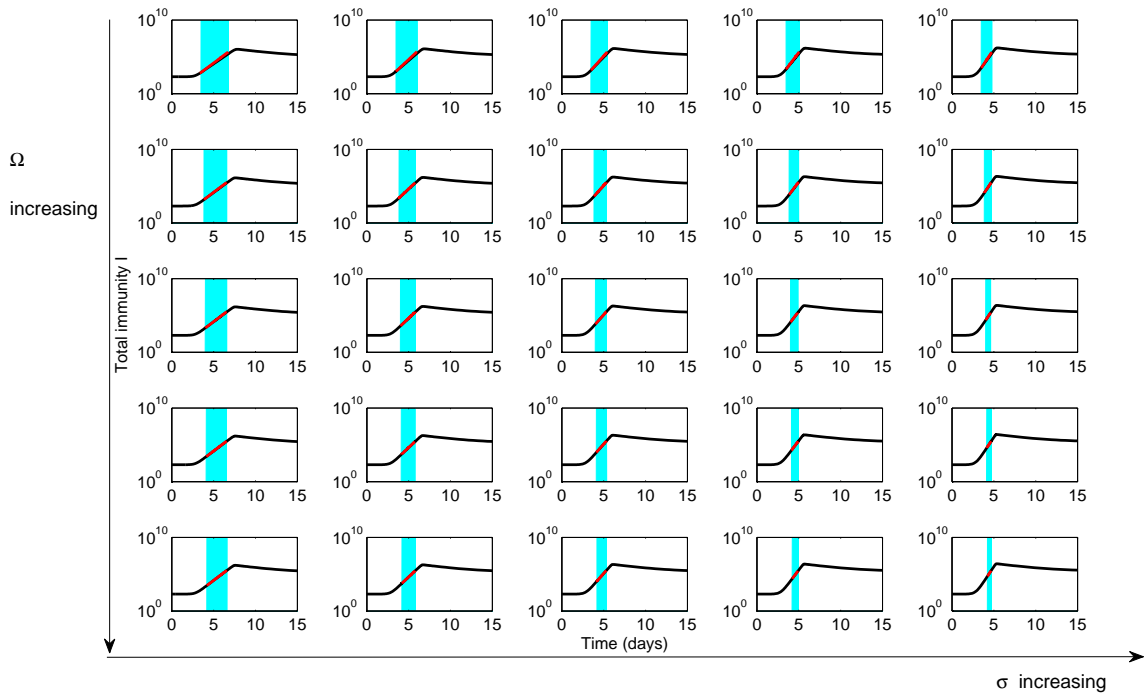

Figure S7: **Immunity growing during adaptive treatment over a range of  $\Omega$  and  $\sigma$ .** We plot how total immunity changes during simulations of adaptive treatment with  $\Omega > k$ , (blue lines) and superimpose the dynamics approximated by Equation 20 in the paper, in red. There is a clear match between the two, confirming the validity of this approximation. The range for  $\Omega$  is  $[10^5, 10^6]$ , while the rate of immune growth  $\sigma$  varies in  $[2, 4]$ . Parameters as in Table 1.
